# Supplementary material for: Partial revision of the neustonic genus Scapholeberis Schoedler, 1858 (Crustacea: Cladocera): decoding of the barcoding results
Source: PeerJ. 2020 Nov 25;8:e10410. doi: 10.7717/peerj.10410 (PMC7698698; doi:10.7717/peerj.10410)
Supplement: Supplemental Information 2 [file peerj-08-10410-s002.xls]

## Sheet: used for morphological analysis
Types	Complete_number	Last_determination	Number	Sex	Country	State	Locality	Day	Month	Year	Collector	Grad_transformed	Grad1_transformed
Holotype	MGU Ml 189	Scapholeberis smirnovi	1	females	Russia (Asian)	Primorski Territory	A puddle on the road to Maloe Utinoe Lake		9	2010	N. M. Korovchinsky	43.4127	131.821
Paratypes	MGU Ml 190	Scapholeberis smirnovi	58	females	Russia (Asian)	Primorski Territory	A puddle on the road to Maloe Utinoe Lake		9	2010	N. M. Korovchinsky	43.4127	131.821
	MGU Ml 197	Scapholeberis cf. intermedius	20	females	Ethiopia	Amhara	Bahir Dar Bay of Lake Tana, Blue Nile Basin, a small oxbow 1	17	10	2015	A.N. Neretina & W. Zelalem	11.6131	37.376
Paratypes	MGU Ml 198	Scapholeberis smirnovi	14	females	Russia (Asian)	Primorski Territory	Puddle 2 near the reservoir of Luchegorskaya power station	10	9	2007	A. A. Kotov & S. A. Ivanov	46.4521	134.299
Paratypes	MGU Ml 199	Scapholeberis smirnovi	15	females	Russia (Asian)	Sakhalin Area	Puddles between see and road, Puzina Peninsula	9	9	2008	A. A. Kotov & N. M. Korovchinsky	46.8052	143.271
Paratypes	MGU Ml 200	Scapholeberis smirnovi	15	females	Japan	Waka-yama	Shin-Ike, Iwade County	31	7	2005	S Ishida	34.2808	135.33
Paratypes	MGU Ml 201	Scapholeberis smirnovi	15	females	Russia (Asian)	Sakhalin Area	Puddle near Susuya River, Yuzhno-Sakhalinsk	11	9	2008	A. A. Kotov & N. M. Korovchinsky	46.9472	142.695
Paratypes	MGU Ml 202	Scapholeberis smirnovi	14	females	Russia (Asian)	Primorski Territory	Lake Kirpichnoe, region of Lake Khanka	10	9	2009	N. M. Korovchinsky	44.7241	132.029
Paratypes	MGU Ml 203	Scapholeberis smirnovi	11	females	Russia (Asian)	Primorski Territory	A roadside pool near Lake Khanka	11	9	2009	N. M. Korovchinsky	44.941	131.953
Paratypes	MGU Ml 204	Scapholeberis smirnovi	12	females	Russia (Asian)	Primorski Territory	A puddle on the road to Maloe Utinoe Lake	8	9	2010	N. M. Korovchinsky	43.4127	131.821
Paratypes	MGU Ml 205	Scapholeberis smirnovi	11	females	South Korea	Jeollabuk-do	Susi Reservoir	31	10	2016	H.G. Jeong	35.9985	126.87
Paratypes	MGU Ml 206	Scapholeberis smirnovi	14	females	Russia (Asian)	Primorski Territory	A pond in the valley of Razdol'naya River	15	6	2012	Y. V. Deart	43.3665	131.746
Paratypes	MGU Ml 207	Scapholeberis smirnovi	12	females	South Korea	Gangwon-do	Dongmak reservoir	13	7	2017	A.A. Kotov, Kyu Suk Chae, Sunjung Ji, Hyensoo Kim	37.6924	128.912
Paratypes	MGU Ml 208	Scapholeberis smirnovi	14	females	South Korea	Jeju-do	Yeonhwa pond (with Lotus)	9	6	2018	A.A. Kotov & H.M. Yang	33.4552	126.348
Paratypes	MGU Ml 209	Scapholeberis smirnovi	11	females	South Korea	Jeju-do	Pond near 31 (Phragmites + Trapa)	10	6	2018	A.A. Kotov, H.M. Yang & C.W. Lee	33.2707	126.272
Paratypes	MGU Ml 210	Scapholeberis smirnovi	14	females	Russia (Asian)	Khabarovsk Territory	A puddle at edge of a Sphagnum swamp, near Gerbi	10	8	2018	P.G. Garibian, E.S. Chertoprud	50.9483	134.432
Lectotype	DAD 1070/159	Scapholeberis intermedius	1	females	Sri Lanka		"Sri Lanka", no further information
Paralectotypes	DAD 1070/159 (on the same slide with the lectotype)	Scapholeberis intermedius	3	females	Sri Lanka		"Sri Lanka", no further information
Paralectotypes	DAD 1070/155	Scapholeberis intermedius	1	females	Sri Lanka		"Sri Lanka", no further information
Paralectotypes	DAD 1070/156	Scapholeberis intermedius	2	females	Sri Lanka		"Sri Lanka", no further information
Paralectotypes	DAD 1070/157	Scapholeberis intermedius	1	females	Sri Lanka		"Sri Lanka", no further information
Paralectotypes	DAD 1070/158	Scapholeberis intermedius	3	females	Sri Lanka		"Sri Lanka", no further information
Paralectotypes	DAD 1070/160	Scapholeberis intermedius	3	females	Sri Lanka		"Sri Lanka", no further information
	n/n	Scapholeberis kingii		ephippial & parth. females	Australia	Tasmania	Roadside pool near Lake Bantic, West Coast	25	12	1997	R. Walsh
	n/n	Scapholeberis kingii		ephippial & parth. females	Australia	New South Wales	Farm Dam				S. Jacobs & Y. Kobayashi	-36.3851	149.976
Paratypes	NIBRIV0000870500	Scapholeberis smirnovi	20	females	South Korea		Simok-ri, Jigok-myeon, Hamyang-gun, Gyeongsangnam-do		9	2011	A. A. Kotov & H. G. Jeong	35.6069	127.776
Paratypes	NIBRIV0000870501	Scapholeberis smirnovi	20	females	South Korea		Swamp beside road near Sin Yeongri Res.	3	4	2012	H.G. Jeong, A.A. Kotov, M.A. Gololobova & M.A. Kotova	36.3322	127.165
